# Supplementary material for: Antitumour activity of the novel flavonoid Oncamex in preclinical breast cancer models
Source: PubMed Central journal article supplement — Br J Cancer. 2016 Mar 31;114(8):905–16. doi: 10.1038/bjc.2016.6 (PMC4984802; doi:10.1038/bjc.2016.6), 2016-03-31
Supplement: bjc20166x3.pdf [file bjc20166x3.pdf]

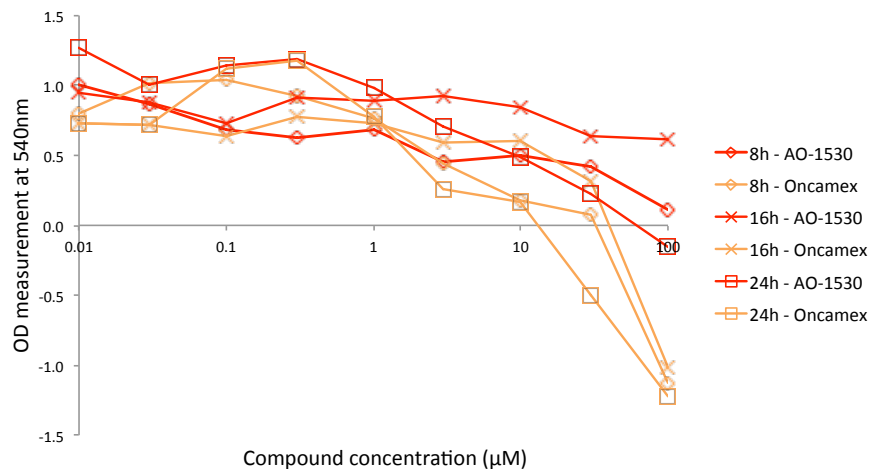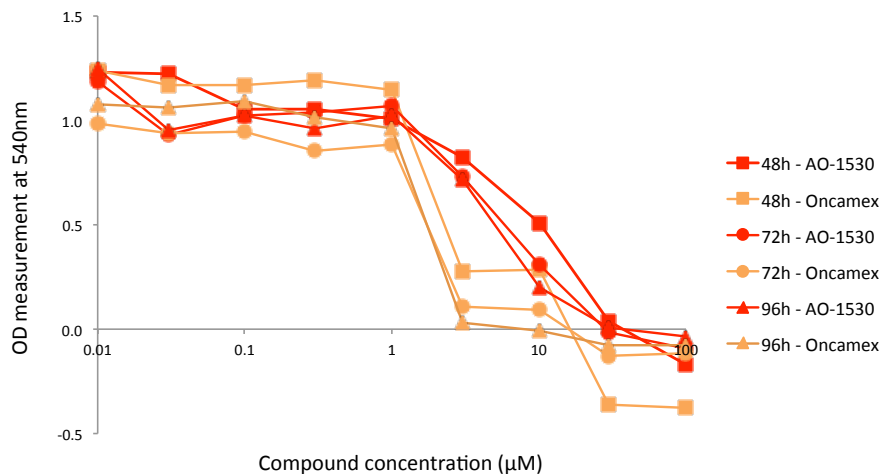

### Supplementary Figure 3 Timing of the antiproliferative effects of Oncamex<sup>TM</sup> and AO-1530.

The timing of AO-1530 and Oncamex<sup>TM</sup>'s effects on MCF-7 cells was studied by a series of SRB assays. Results showed that 8 h treatment with Oncamex<sup>TM</sup> induced an antiproliferative effect comparable to that observed after much longer treatment for 96h, whereas at least 24 h treatment with AO-1530 was necessary to reach inhibitory levels similar to those seen after 96 h. This suggest the second generation analogue Oncamex<sup>TM</sup> is not only a more potent chemical entity, but it also exert its antitumour effect more quickly, most likely due to the improved delivery of the drug to the mitochondrial compartment.
